# Supplementary material for: Collective Cognition in Humans: Groups Outperform Their Best Members in a Sentence Reconstruction Task
Source: PLoS One. 2013 Oct 17;8(10):e77943. doi: 10.1371/journal.pone.0077943 (PMC3798465; doi:10.1371/journal.pone.0077943)
Supplement: Data S1 — F-measure and WER of all individuals, average individuals, best individuals and groups. (XLSX) [file pone.0077943.s003.xlsx]

## Sheet: Info
Group = Group number
Individual = Individual identity
Sentence = Type of sentence (A = Airport, T = Train)
Order = Order of the sentence (1 = first sentence the group received; 2 = last sentence the group received)
WER = Word Error Rate
1 min = 1 minute
4 min = 4 minutes
Aver indiv = Average individual
Best indiv = Best individual

## Sheet: Indiv_Treatment_All_Individuals
				WER	WER	F-measure	F-measure
Group	Individual	Sentence	Order	1 min	4 min	1 min	4 min
1	1	T	1	0.8	0.65	0.4	0.545
1	2	T	1	0.7	0.7	0.615	0.571
1	3	T	1	0.75	0.75	0.467	0.467
1	4	T	1	0.6	0.6	0.462	0.462
1	5	T	1	0.75	0.75	0.364	0.462
1	7	T	1	0.75	0.85	0.333	0.571
1	8	T	1	0.75	0.6	0.4	0.462
2	1	T	2	0.75	0.75	0.364	0.308
2	2	T	2	0.65	0.65	0.5	0.5
2	3	T	2	0.6	0.6	0.667	0.615
2	4	T	2	0.5	0.4	0.571	0.533
2	5	T	2	0.5	0.5	0.8	0.8
2	6	T	2	0.45	0.35	0.714	0.75
2	7	T	2	0.45	0.45	0.563	0.563
2	8	T	2	0.45	0.45	0.6	0.6
3	1	T	2	0.55	0.65	0.667	0.625
3	2	T	2	0.45	0.45	0.714	0.714
3	3	T	2	0.55	0.55	0.615	0.571
3	4	T	2	0.35	0.3	0.714	0.714
3	5	T	2	0.5	0.5	0.6	0.6
3	6	T	2	0.4	0.4	0.643	0.643
3	7	T	2	0.4	0.25	0.667	0.733
3	8	T	2	0.8	0.8	0.4	0.4
4	1	T	2	0.4	0.45	0.857	0.8
4	2	T	2	0.65	0.7	0.545	0.545
4	3	T	2	0.75	0.65	0.333	0.333
4	4	T	2	0.25	0.3	0.714	0.667
4	5	T	2	0.45	0.4	0.667	0.615
4	6	T	2	0.45	0.5	0.643	0.667
4	7	T	2	0.45	0.45	0.667	0.667
4	8	T	2	0.45	0.45	0.688	0.733
5	1	A	2	0.4762	0.4762	0.515	0.515
5	2	A	2	0.6191	0.5714	0.606	0.606
5	3	A	2	0.6667	0.5714	0.455	0.538
5	4	A	2	0.7619	0.5714	0.615	0.615
5	5	A	2	0.381	0.381	0.564	0.611
5	6	A	2	0.5714	0.5238	0.467	0.515
5	7	A	2	0.8095	0.7619	0.37	0.37
5	8	A	2	0.5714	0.5714	0.545	0.5
6	1	T	1	0.65	0.7	0.5	0.462
6	2	T	1	0.65	0.65	0.538	0.5
6	3	T	1	0.65	0.75	0.167	0.308
6	4	T	1	0.55	0.45	0.615	0.615
6	5	T	1	0.7	0.7	0.333	0.571
6	6	T	1	0.55	0.55	0.667	0.667
6	7	T	1	0.6	0.6	0.667	0.667
6	8	T	1	0.55	0.55	0.545	0.545
7	1	T	1	0.6	0.55	0.333	0.364
7	2	T	1	0.45	0.45	0.692	0.692
7	3	T	1	0.5	0.55	0.692	0.692
7	4	T	1	0.45	0.45	0.714	0.714
7	5	T	1	0.7	0.7	0.5	0.5
7	6	T	1	0.5	0.5	0.667	0.667
7	7	T	1	0.3	0.3	0.667	0.667
7	8	T	1	0.55	0.55	0.714	0.714
8	1	T	2	0.45	0.45	0.714	0.714
8	2	T	2	0.35	0.35	0.75	0.75
8	3	T	2	0.2	0.2	0.813	0.813
8	4	T	2	0.5	0.3	0.643	0.75
8	5	T	2	0.45	0.4	0.615	0.643
8	6	T	2	0.7	0.55	0.364	0.429
8	7	T	2	0.3	0.3	0.714	0.667
8	8	T	2	0.45	0.4	0.692	0.692
9	1	A	1	1	1	0	0
9	2	A	1	0.7143	0.5238	0.25	0.444
9	3	A	1	0.6667	0.6191	0.25	0.3
9	4	A	1	0.7619	0.7619	0.4	0.4
9	5	A	1	0.4286	0.4286	0.556	0.5
9	6	A	1	0.6667	0.6667	0.2	0.2
9	7	A	1	0.7143	0.7143	0.364	0.182
9	8	A	1	0.6667	0.6191	0.2	0.242
10	1	A	1	0.7143	0.5714	0.444	0.6
10	2	A	1	0.8571	0.8571	0.25	0.25
10	3	A	1	0.9524	0.9524	0	0
10	4	A	1	0.8095	0.8095	0	0
10	5	A	1	0.8095	0.7619	0.444	0.4
10	6	A	1	0.5714	0.5714	0.444	0.444
10	7	A	1	0.4286	0.4286	0.636	0.636
10	8	A	1	0.5714	0.5238	0.444	0.5
11	1	T	2	0.6	0.65	0.5	0.467
11	2	T	2	0.65	0.6	0.364	0.5
11	3	T	2	0.55	0.5	0.583	0.538
11	4	T	2	0.8	0.8	0.2	0.364
11	5	T	2	0.4	0.35	0.786	0.8
11	6	T	2	0.5	0.5	0.462	0.462
11	7	T	2	0.55	0.55	0.333	0.333
11	8	T	2	0.5	0.5	0.643	0.643
12	1	T	1	0.65	0.65	0.5	0.538
12	2	T	1	0.85	0.8	0.4	0.5
12	3	T	1	0.6	0.5	0.667	0.667
12	4	T	1	0.45	0.45	0.692	0.6
12	5	T	1	0.75	0.75	0.333	0.167
12	6	T	1	0.75	0.75	0.222	0.222
12	7	T	1	0.75	0.75	0.333	0.333
12	8	T	1	0.65	0.65	0.4	0.4
13	1	A	2	0.6191	0.5714	0.25	0.25
13	2	A	2	0.4286	0.4286	0.455	0.455
13	3	A	2	0.381	0.4286	0.694	0.795
13	4	A	2	0.7619	0.5238	0.5	0.576
13	5	A	2	0.5238	0.5238	0.5	0.5
13	6	A	2	0.8571	0.8095	0.25	0.25
13	7	A	2	0.5238	0.3333	0.639	0.833
13	8	A	2	0.6667	0.6191	0.5	0.5
14	1	A	1	0.6667	0.5714	0	0.222
14	2	A	1	0.4286	0.4286	0.727	0.727
14	3	A	1	0.9048	0.9048	0.25	0.25
14	4	A	1	0.7619	0.7619	0.222	0.222
14	5	A	1	0.381	0.2857	0.6	0.727
14	6	A	1	0.9048	0.9048	0	0
14	7	A	1	0.9048	0.9048	0	0
14	8	A	1	0.5238	0.4286	0.424	0.556
15	1	A	2	0.5238	0.4762	0.5	0.75
15	2	A	2	0.4286	0.4286	0.424	0.424
15	3	A	2	0.381	0.3333	0.727	0.727
15	4	A	2	0.5238	0.4762	0.455	0.455
15	5	A	2	0.381	0.2857	0.636	0.846
15	6	A	2	0.5714	0.6191	0.5	0.4
15	7	A	2	0.4286	0.3333	0.694	0.795
15	8	A	2	0.4286	0.4762	0.515	0.515
16	1	A	2	0.6667	0.4762	0.25	0.639
16	2	A	2	0.6667	0.6667	0.296	0.364
16	3	A	2	0.6667	0.4762	0.367	0.513
16	4	A	2	0.3333	0.3333	0.545	0.545
16	5	A	2	0.2857	0.2857	0.667	0.615
16	6	A	2	0.5714	0.5714	0.4	0.583
16	7	A	2	0.8571	0.8571	0.333	0.222
16	8	A	2	0.6667	0.6667	0.367	0.367
17	1	T	1	0.65	0.7	0.538	0.6
17	2	T	1	0.6	0.5	0.5	0.462
17	3	T	1	0.55	0.5	0.4	0.4
17	4	T	1	0.65	0.8	0.462	0.429
17	5	T	1	0.65	0.6	0.5	0.5
17	6	T	1	0.65	0.65	0.5	0.5
17	7	T	1	0.7	0.7	0.182	0.182
17	8	T	1	0.45	0.6	0.462	0.375
18	1	A	1	0.6191	0.6191	0.6	0.545
18	2	A	1	0.6667	0.5714	0.333	0.333
18	3	A	1	0.5238	0.5238	0.455	0.385
18	4	A	1	0.6667	0.6191	0.444	0.444
18	5	A	1	0.5238	0.5238	0.444	0.444
18	6	A	1	0.7143	0.5714	0.4	0.4
18	7	A	1	0.5714	0.4762	0.444	0.444
18	8	A	1	0.8095	0.7619	0.25	0.25
19	1	A	2	0.4762	0.2857	0.6	0.619
19	2	A	2	0.4286	0.4286	0.641	0.641
19	3	A	2	0.4286	0.4286	0.5	0.5
19	4	A	2	0.7619	0.6667	0.222	0.2
19	5	A	2	0.6667	0.6667	0.545	0.667
19	6	A	2	0.6667	0.6191	0.2	0.182
19	7	A	2	0.4762	0.4286	0.6	0.583
19	8	A	2	0.4286	0.381	0.636	0.615
20	1	A	1	0.8095	0.9048	0	0
20	2	A	1	0.7143	0.8571	0.296	0.333
20	3	A	1	0.7619	1	0.25	0
20	4	A	1	0.7619	0.7619	0.444	0.5
20	5	A	1	1	1	0	0
20	6	A	1	0.9524	1	0	0
20	7	A	1	1	1	0	0
20	8	A	1	0.4286	0.4286	0.583	0.583
21	1	T	1	0.75	0.75	0.667	0.545
21	2	T	1	0.55	0.5	0.667	0.667
21	3	T	1	0.6	0.45	0.545	0.5
21	4	T	1	0.5	0.45	0.643	0.733
21	5	T	1	0.75	0.75	0.182	0.182
21	6	T	1	0.65	0.65	0.5	0.462
21	7	T	1	0.7	0.7	0.667	0.692
21	8	T	1	0.6	0.6	0.5	0.5

## Sheet: Indiv_Treatment_Summary
			WER	WER	WER	WER	F-measure	F-measure	F-measure	F-measure
			aver indiv	aver indiv	best indiv	best indiv	aver indiv	aver indiv	best indiv	best indiv
Group	Sentence	Order	1 min	4 min	1 min	4 min	1 min	4 min	1 min	4 min
1	T	1	0.728571	0.7	0.6	0.6	0.434429	0.505714	0.6154	0.5714
2	T	2	0.54375	0.51875	0.45	0.35	0.597375	0.583625	0.8	0.8
3	T	2	0.5	0.4875	0.35	0.3	0.6275	0.625	0.7143	0.7143
4	T	2	0.48125	0.4875	0.25	0.3	0.63925	0.628375	0.8571	0.8
5	A	2	0.60715	0.553563	0.381	0.381	0.517125	0.53375	0.6154	0.6154
6	T	1	0.6125	0.61875	0.55	0.45	0.504	0.541875	0.6667	0.6667
7	T	1	0.50625	0.50625	0.3	0.3	0.622375	0.62625	0.7143	0.7143
8	T	2	0.425	0.36875	0.2	0.2	0.663125	0.68225	0.8125	0.8125
9	A	1	0.7024	0.666687	0.4286	0.4286	0.2775	0.2835	0.5556	0.5
10	A	1	0.714275	0.684513	0.4286	0.4286	0.33275	0.35375	0.6364	0.6364
11	T	2	0.56875	0.55625	0.4	0.35	0.483875	0.513375	0.7857	0.8
12	T	1	0.68125	0.6625	0.45	0.45	0.443375	0.428375	0.6923	0.6
13	A	2	0.59525	0.529762	0.381	0.4286	0.4735	0.519875	0.6944	0.7949
14	A	1	0.68455	0.648825	0.381	0.2857	0.277875	0.338	0.7273	0.7273
15	A	2	0.45835	0.428575	0.381	0.2857	0.556375	0.614	0.7273	0.7273
16	A	2	0.589287	0.541662	0.2857	0.2857	0.403125	0.481	0.6667	0.6154
17	T	1	0.6125	0.63125	0.45	0.6	0.443	0.431	0.5385	0.6
18	A	1	0.636912	0.583338	0.5238	0.5238	0.42125	0.405625	0.6	0.5455
19	A	2	0.541687	0.488125	0.4286	0.381	0.493	0.500875	0.641	0.641
20	A	1	0.803575	0.86905	0.4286	0.4286	0.196625	0.177	0.5833	0.5833
21	T	1	0.6375	0.60625	0.5	0.45	0.546375	0.535125	0.6667	0.6923

## Sheet: Group_Treatment_Summary
			WER	WER	F-measure	F-measure
			best indiv	group	best indiv	group
Group	Sentence	Order	1 min	4 min	1 min	4 min
1	A	2	0.3333	0.3333	0.7619	0.7381
2	A	1	0.4286	0.3333	0.5455	0.6667
3	A	1	0.3333	0.0476	0.7273	0.9286
4	A	1	0.4286	0.381	0.7222	0.6923
5	T	1	0.3	0.25	0.8	0.9333
6	A	2	0.5238	0.3333	0.6389	0.7436
7	A	2	0.3333	0.2857	0.7222	0.9048
8	A	1	0.4286	0.381	0.6364	0.5385
9	T	2	0.4	0.3	0.6923	0.75
10	T	2	0.2	0.15	0.9375	0.9375
11	A	1	0.4762	0.3333	0.5333	0.6061
12	A	2	0.4286	0.2857	0.6	0.7857
13	T	1	0.45	0.45	0.6667	0.5714
14	T	2	0.2	0.35	0.6667	0.75
15	T	1	0.45	0.2	0.6667	0.75
16	T	1	0.25	0.2	0.7857	0.875
17	A	2	0.3333	0.2857	0.7857	0.7619
18	T	2	0.25	0.2	0.6667	0.75
19	T	1	0.5	0.35	0.6667	0.875
20	T	2	0.35	0.25	0.6875	0.6875
21	A	2	0.381	0.381	0.6667	0.5128
			0.37041	0.289567	0.694124	0.750419
